# Supplementary material
Source: HighWire-hosted journal article supplement (doi:10.1101/rna.068221.118)
Supplement: Supplemental_Information_Figure_legends.docx [file Supplemental_Information_Figure_legends.docx]

**SUPPLEMENTAL INFORMATION**

**Supplemental Figure 1: (A). Gene set enrichment analysis of 744 human U12-type intron containing genes.** Significant enrichment in several essential biological pathways (Enrichment = Genes in overlap (k)/Genes in gene set (K) as a percentage) as seen in the 744 U12-type intron-containing genes kindly provided to us by Drs. Stephen Scherer and Daniele Merico. Dotted line represents expected frequency of genes containing a U12-type intron in any gene set by chance (3.72%) based on 744 out of ~20,000 genes in the human genome. **(B**) **RNPC3 is part of a molecular bridge that assembles on minor class introns.** The U11 and U12 snRNAs in the U11/U12 di-snRNP recognize the highly conserved 5' splice site (5'ss) and branchpoint sequence (BPS) that distinguish minor class introns from major class introns. 65K binds to the U12 snRNA and the 59K protein. Together with U11 snRNA and the 48K protein, these components form a ‘molecular bridge’ that brings the 5' end of the intron (red) and the BPS in close proximity for the catalytic steps of splicing, which are performed in conjunction with additional snRNPs that are shared with major class splicing.

**Supplemental Figure 2:** ***Rnpc3* transcript expression is enriched in proliferative tissues**. Tissues were collected from *Rnpc3neo/+* mice (8-12 weeks) harboring a knock-in *lacZ* gene at the *Rnpc3* locus and histological sections were stained for -galactosidase activity (blue) to reveal sites of *Rnpc3* expression. Blue staining was most notable in the proliferative compartments of the stomach (**A)**, small intestine (**B)** and colonic epithelia (**C).** Robust and specific expression was also detected in the epithelial stem cells of the hair follicle bulge **(D)**, the lung airway epithelium (**E)** and Purkinje cells of the brain (**F**). **(A’-F’)** is a higher magnification of the dashed box area in the left panel showing regions of specific -galactosidase activity/*Rnpc3* expression. Scale bar in A-F = 200μm, scale bar in A’-F’ = 50μm.

**Supplemental Figure 3: The major class spliceosome protein component U1A is expressed throughout the small intestinal epithelium.** Immunohistochemical analysis of the major class spliceosome specific U1A protein. **(A)** Epithelial cells throughout the entire mouse small intestine are positive for the U1A protein. **(B)** Both the proliferative cells residing in the crypts and the differentiated cells migrating along the villi show nuclear localization of the U1A protein. **(C)** Higher magnification of the proliferative cells at the base of the small intestinal crypts.

**Supplemental Figure 4: Splicing of U2-type introns is not significantly affected following *Rnpc3* recombination.** Semi-quantitative RT-PCR analysis of RNA extracted from colonic epithelial cells 4d post-tamoxifen treatment using primers spanning U2-type introns shows no difference in U2-type splicing efficiency between *Rnpc3lox/lox* control and *UBC-CreERT2;Rnpc3lox/lox* samples in transcripts shown to have U12-type intron splicing deficiency in Fig. 7. A schematic representation of spliced and incompletely spliced (intron-retaining) transcripts is shown at the positions of the expected sizes on the right (white boxes are exons, black lines are introns).
