# Supplementary material
Source: HighWire-hosted journal article supplement (doi:10.1101/rna.068221.118)
Supplement: Supplemental_Table_1.docx [file Supplemental_Table_1.docx]

**Supplementary Table 1: PCR primer sequences used in Doggett *et al*.**

| Name | Forward | Reverse |
| --- | --- | --- |
| Genotyping | | |
| Cre | GGG ATT GCT TAT AAC ACC CTG TTA CG | TAT TCG GAT CAT CAG CTA CAC CAG AG |
| Actin | TGA GAA GCT GGC CAA AGA GAA GGG TTA C | GTG ACC TGT TAC TTT GGG AGT GGC AAG C |
| Rnpc3 | AGA GAA CAG TAT TTT AGT TCC AAG ATA TGC | CCT CAC ACA GCA TGG CTG AGA AGG |
| Neo/LacZ (Lar3) | CAA CGG GTT CTT CTG TTA GTC C | Rnpc3 specific primer |
| Recombination | AGA GAA CAG TAT TTT AGT TCC AAG ATA TGC | CAA TGC TAC ACC CAA GTA ACA CT |
| RT-qPCR | | |
| Gapdh | CAA CTC ATC CAA GAT TGT CAG CAA | TAC TTG GCA GGT TTC TCC AGG C |
| Hrpt1 | GCC CCA AAA TGG TTA AGG TT | CAA GGG CAT ATC CAA CAA CA |
| Rnpc3 | CCA CCA TCA AGC ACA ATC CTC GCA | TCG GTC CAA ATG GTG TGG GCA |
| Parp1_U12_intron | CGA CAC CTG CCT GCT GTA TAA TGA | AGG CAA GTT GTC CTG GGA TCT AAG AG |
| Vps16_U12_intron | TCT CAC CTA CAC CCA GTA TCC CTA TG | ATA AGG CCT GTT TGC CAG GGA T |
| Ccnk_U12_intron | GGG CTC GCT TCA TCT TTG AT | GAC TGC ATG CTT GTC GAC AG |
| Cdc45_U12_intron | TCC CGT CAT AAC CAC CGA AA | ACG AGT ACT GCC TAA ACC CC |
| Mapk11_U12_intron | CTC TAC AGT GTA CCA GGG GC | TTT GCC AGA ACC TCA GGA CT |
| Braf_U12_intron | ACA CGC CAA GTC AAT CAT CCA CAG | GGG TGG TTC AGA CTT CGC AGA CC |
| Mapk1_U12_intron | GCG CTT CAG ACA TGA GAA CA | GCA GTG GCA GCA GCT AAC TT |
| E2F1_U12_intron | CAA CTG CAG GAG AGT GAG C | CAA TGC ACC CTG ACC AAT CC |
| Ccnt2_U12_intron | GGA GTG GAA GCG GAT GAA GA | CAG GGC CGC AAC TAG AAA A |

| **Splicing RT-PCR** | | | | | |
| --- | --- | --- | --- | --- | --- |
|  | Name | Forward primer | Reverse primer | Intron retained (bp) | Spliced size (bp) |
| **Crossing U12-type intron** | **Parp1 E21-23** | TAT GAA CTC AAG CAT GCT TCA C | CTC GCA CTT TAC CAC AGG GAT GTC | 505 | 266 |
| **Vps16 E13-14** | GAC AGA TTT CCA CCT GAC AGC | TGT CTA GCA GCA CCT GGA TGG | 263 | 136 |
| **C19orf54 E4-6** | ACA CCG CAC AGG GAG AAA TGT T | CAG TGG GCC TTA TGG CCT TTC TTT | 303 | 214 |
| **Mapk8 E5-6**  **(JNK1)** | CAT TTG GTC AGT TGG GTG CA | GAA AAG CAC ATC GGG GAA CA | 1479 | 220 |
| **Mapk11 E8-9**  **(p38β)** | AGG CCC TCT TTC CTG GAA AC | TTT GCC AGA ACC TCA GGA CT | 287 | 88 |
| **Ccnk E3-4**  **(cyclin K)** | GGG CTC GCT TCA TCT TTG AT | TGG GAA TTG TTT GAA GGA ATG GA | 672 | 116 |
| **Cdk5 E8-10** | GCA TCT TTG CAG AGC TGG CTA | GGC CAT TGT TCC TCA GTC GG | 530 | 115 |
| **RasGRP2 E2-3** | ATA CCT TCC TCT CAG CTG GC | TGA CCA AGT GAC ACG TTT TCA | 549 | 100 |
| **Cdc45 E10-11** | TCC CGT CAT AAC CAC CGA AA | GAG GGA CCA GTG CTG ATA CA | 709 | 111 |
| **Crossing U2-type intron** | **Gapdh E3-5** | ACC ACC ATG GAG AAG GCC GGG | CAG TGA TGG CAT GGA CTG TGG | 473 | 241 |
| **Parp1 E16-17** | CCA GAT CCT AGA TCT CTC CAA TCG CT | GTA GTT GAC GTC GAT GGG ATC CTT | 691 | 202 |
| **Vps16 E11-12** | TGC TGT TAG AGG CCC AGA AGG AAT | GAC TCT TTT GCA TGT CTG GCT GGT | 466 | 153 |
| **C19orf54 E2-3** | AAG TGA CCT GCA GTG GAT CC | CCA CCT GCA CTA GTC TTT CC | 543 | 146 |
| **Mapk8 E8-9** | CCA GTC AGG CAA GAG ATT TGT | CTG CTT GTC CGG GAT CTT TG | 698 | 152 |
| **Mapk11 E6-7** | TGA AGC CCA GCA ATG TAG C | GGC CAC ATA TCC GGT CAT CT | 187 | 101 |
| **Ccnk E8-9** | TCC CTG TTG ACG TTC TGG AA | TGG TTT CTT GGG CTG TTG TG | 549 | 248 |
| **Cdk5 E6-7** | TCA TTC CTC TTC CAG CTG CT | CAG CCA ATT TCA ACT CCC CA | 267 | 118 |
| **RasGRP2 E5-6** | ATG GAG CTG GCA GAA CAT CT | TTG GAC CCA CTG AGA GAC AC | 362 | 159 |
| **Cdc45 E1-2** | AGC GCC AGT TCT AGG TAT CC | GAG GAT CTT GCA AGC ACA CA | 290 | 140 |
